# Supplementary material for: Infection of Galleria mellonella (Lepidoptera) Larvae With the Entomopathogenic Fungus Conidiobolus coronatus (Entomophthorales) Induces Apoptosis of Hemocytes and Affects the Concentration of Eicosanoids in the Hemolymph
Source: Front Physiol. 2022 Jan 6;12:774086. doi: 10.3389/fphys.2021.774086 (PMC8769874; doi:10.3389/fphys.2021.774086)
Supplement: Supplementary Table S1 — Concentration of selected eicosanoids in the hemolymph of G. mellonella larvae after infection with C. coronatus- row data. The measurements were performed using ELISA tests. Control, non-infected, healthy larvae; F24, larvae sampled immediately after 24-h exposure to C. coronatus sporulating colonies; F48, larvae sampled 24 h after 24-h exposure. [file Table_1.XLSX]

## Sheet: Arkusz1
			PGE1					PGE2						PGA1						PGF 2α
		concentration [pg/ml]						concentration [pg/ml]						concentration [pg/ml]						concentration [pg/ml]
		independent replicates	mean	standard deviation				independent replicates	mean	standard deviation				independent replicates	mean	standard deviation				independent replicates	mean	standard deviation
	control	11.1527					control	96.5811					control	29.5466					control	83.8051
		11.1527						86.2549						25.478						89.8618
		12.4071						73.294						33.5548						81.1718
		13.8027	12.1288	1.26291				79.152	83.8205	10.0227				12.5487	25.282	7.88672				93.8117	87.1626	5.73464
	F24	389.424					F24	110.118					F24	162.548					F24	147.795
		465.13						122.19						124.54						153.193
		403.509						153.198						100.095						158.912
		481.954	435.004	45.3922				111.622	124.282	20.0118				136.985	131.042	22.5164				178.934	159.708	13.5969
	F48	1350.48					F48	229.128					F48	100.095					F48	86.9651
		1303.34						202.788						93.3538						89.0718
		1130.67						198.253						90.1554						87.6234
		1449.93	1308.6	133.437				122.744	188.228	45.729				111.13	98.6836	8.03195				81.9618	86.4055	3.0904
			8-iso-PGF 2α					LTB4						TXA2						TXB2						11-dehydro-TXB2
		concentration [pg/ml]						concentration [pg/ml]						concentration [pg/ml]						concentration [pg/ml]						concentration [pg/ml]
		independent replicates	mean	standard deviation				independent replicates	mean	standard deviation				independent replicates	mean	standard deviation				independent replicates	mean	standard deviation				independent replicates	mean	standard deviation
	control	412.074					control	82.0976					control	775.461						177.499					control	10.0551
		329.104						111.18						623.968						289.36						12.1207
		317.001						89.9166						718.995						202.206						9.66046
		469.822	382	72.2034				57.0551	85.0624	22.3525				689.25	701.919	63.0794			control	265.365	233.608	52.444				12.7853	11.1554	1.53123
	F24	958.854					F24	98.4802					F24	666.641						166.302					F24	12.4486
		839.797						89.9166						724.258						114.335						7.39742
		1063.4						57.0551						600.821						192.562						12.4486
		1065.4	981.863	106.988				72.7197	79.5429	18.4255				607.8	649.88	57.7077			F24	145.845	154.761	33.0448				17.8488	12.5358	4.26794
	F48	404.426					F48	84.6253					F48	863.5						102.547					F48	4.89112
		334.952						64.4129						836.362						95.5775						8.34148
		441.67						52.0937						797.761						68.548						9.28133
		435.899	404.237	49.0041				92.685	73.4542	18.5529				584.54	770.541	126.9			F48	89.254	88.9816	14.6644				12.547	8.76523	3.14942
